# 1 **Genome-wide analysis of mobile element** 2 **insertions in human genomes**

3 **Running title:** Mobile element insertion map of 5,675 genomes

4 Yiwei Niu<sup>1,2,5</sup>, Xueyi Teng<sup>1,3,5</sup>, Yirong Shi<sup>1,3</sup>, Yanyan Li<sup>1,2</sup>, Yiheng Tang<sup>1,3</sup>, Peng Zhang<sup>1</sup>, Huaxia

5 Luo<sup>1</sup>, Quan Kang<sup>1</sup>, The Han100K Initiative<sup>§</sup>, Tao Xu<sup>2,4\*</sup>, Shunmin He<sup>1,3,6\*</sup>

6

7 1 Key Laboratory of RNA Biology, Center for Big Data Research in Health, Institute of Biophysics,

8 Chinese Academy of Sciences, Beijing 100101, China.

9 2 College of Life Sciences, University of Chinese Academy of Sciences, Beijing 100049, China.

10 3 University of Chinese Academy of Sciences, Beijing 100049, China.

11 4 National Laboratory of Biomacromolecules, CAS Center for Excellence in Biomacromolecules,

12 Institute of Biophysics, Chinese Academy of Sciences, Beijing, 100101, China.

13 5 These authors contributed equally to this work.

14 6 Lead contact.

15 \* Corresponding author. Email: [xutao@ibp.ac.cn](mailto:xutao@ibp.ac.cn) (T. X), [heshunmin@ibp.ac.cn](mailto:heshunmin@ibp.ac.cn) (S.M. H)

16 § Full list of participants (collaborators) of the Han100K Initiative can be found online via

17 <http://www.pgghan.org/HCGD/about>.

18

19 **Keywords:** mobile element insertion, MEI, transposable element, whole genome sequencing,

20 variant

## 21 **Abstract**

22 Mobile element insertions (MEIs) are a major class of structural variants (SVs) and have been  
23 linked to many human genetic disorders, including hemophilia, neurofibromatosis, and various  
24 cancers. However, human MEI resources from large-scale genome sequencing are still lacking  
25 compared to those for SNPs and SVs. Here, we report a comprehensive map of 36,699 non-  
26 reference MEIs constructed from 5,675 genomes, comprising 2,998 Chinese samples (~26.2X,  
27 NyuWa) and 2,677 samples from the 1000 Genomes Project (~7.4X, 1KGP). We discovered  
28 that LINE-1 insertions were highly enriched at centromere regions, implying the role of  
29 chromosome context in retroelement insertion. After functional annotation, we estimated that  
30 MEIs are responsible for about 9.3% of all protein-truncating events per genome. Finally, we  
31 built a companion database named HMEID for public use. This resource represents the latest  
32 and largest genomewide study on MEIs and will have broad utility for exploration of human  
33 MEI findings.

## 34 **Introduction**

35 Transposable elements (TEs), also known as transposons or mobile elements, comprise a  
36 significant portion in mammalian genomes (Smit 1999; Deininger et al. 2003; Cordaux and  
37 Batzer 2009), approximately half of the human genome (Lander et al. 2001). Most TEs are  
38 transposition incompetent due to accumulated interior mutations and truncation or various host  
39 repression mechanisms (Goodier 2016). In humans, *Alu*, long interspersed nuclear element 1  
40 (L1), SINE-VNTR-*Alu* (SVA), and HERV-K (also known as HML-2) are four families of TEs  
41 which are still active and capable of creating new insertions (Mills et al. 2007; Huang et al.

42 2012), termed mobile element insertions (MEIs). The transposition events have the potential to  
43 disrupt normal gene function and alter transcript expression or splicing at the sites of integration,  
44 contributing to disease (Payer and Burns 2019). For example, over 120 TE-mediated insertions  
45 have been associated with various human genetic diseases, including hemophilia, Dent disease,  
46 neurofibromatosis and various cancers (Hancks and Kazazian 2016). Apart from the impact  
47 through insertion events, intrinsic sequence properties of TEs endow some MEIs with  
48 functional effects on the host (Payer and Burns 2019), making MEIs differ qualitatively from  
49 typical forms of SVs like copy number variants (CNVs). Another important question related to  
50 MEIs is the integration site preference, which are usually non-random and influenced by  
51 various factors such as DNA sequences and chromatin context (Sultana et al. 2017).

52 However, despite these important functions, integrated resources for polymorphic TEs in  
53 human genomes is still lacking (Goerner-Potvin and Bourque 2018), which could offer a large  
54 pool of MEIs to explore TE diversity and serve as bedrock for phenotype-variant association  
55 studies. And MEIs are not routinely analyzed in most population-scale whole-genome  
56 sequencing (WGS) projects (The 1000 Genomes Project Consortium 2015; Wu et al. 2019,  
57 2019; Cao et al. 2020). To date, the largest and most recent population study of MEIs using  
58 WGS remains the one conducted by the 1KGP, which included 2,504 genomes across 26 human  
59 populations (Sudmant et al. 2015; Gardner et al. 2017). However, the sequencing depth of the  
60 1KGP is low, which may limit the MEI detection sensitivity and accuracy (Rishishwar et al.  
61 2016). In addition, current MEI genetic resources are mainly from European ancestry cohorts,  
62 and the lack of Chinese cohort genomic study on MEIs is a critical part of the missing diversity.

63 In this study, we employed WGS of 5,675 members from newly sequenced Chinese

64 samples and the 1KGP to construct a resource for non-reference MEIs. Although the 1KGP  
65 dataset has already been investigated for MEIs (Sudmant et al. 2015; Gardner et al. 2017), we  
66 included it here to increase population diversity and build a comprehensive MEI map. The  
67 NyuWa dataset has been used to study spectrum of small variant and build reference panel  
68 (Zhang et al. 2020), and the MEIs were not explored yet. Combining two cohorts enabled us to  
69 systematically analyze the genomic distribution, mutational patterns, and functional impacts of  
70 MEIs. From these analyses, we found that L1 MEIs were highly enriched in centromere regions,  
71 and we determined that MEIs represent about 9.3% of all protein-truncating events per  
72 individual, emphasizing the importance of detecting MEI routinely in WGS studies. We have  
73 built a companion database named HMEID (available at <http://bigdata.ibp.ac.cn/HMEID/>) for  
74 polymorphic MEIs, which could be explored for new insights into MEI biology.

## 75 **Results**

### 76 **A Comprehensive Map of Non-reference Human MEIs**

77 To generate a comprehensive map of MEIs from human genomes, we jointly analyzed two  
78 WGS datasets using MELT (Gardner et al. 2017), the low-coverage 1KGP dataset consisting of  
79 2,677 individuals sequenced to ~7.4X coverage (Sudmant et al. 2015) and the high-coverage  
80 NyuWa dataset including 2,998 Chinese samples sequenced to ~26.2X coverage (Table S1)  
81 (Zhang et al. 2020). After site quality filtering, a total of 36,699 non-reference MEIs were kept,  
82 including 26,553 *Alus*, 7,353 L1s, 2,667 SVAs and 126 HERV-Ks (Table 1). Most *Alu* and L1  
83 MEIs were well-supported by split reads (Fig. S1A) and target site duplications (TSDs) (Fig.  
84 S1B). Using Hardy-Weinberg equilibrium (HWE) metrics as a rough proxy of genotyping

85 accuracy, we found that about 87% autosomal MEI sites did not violate the HWE, and when  
86 restricted to the NyuWa dataset, almost all MEIs (97%) on autosomes had high genotyping  
87 accuracy (Fig. S2).

88 **Table 1. MEI discovery in this study.**

|            | Total sites | Mean sites per donor |       | Standard deviation |      |
|------------|-------------|----------------------|-------|--------------------|------|
|            |             |                      |       |                    |      |
|            |             | NyuWa                | 1KGP  | NyuWa              | 1KGP |
| <i>Alu</i> | 26,553      | 1,035                | 884   | 25.3               | 153  |
| LINE-1     | 7,353       | 145                  | 119   | 8.35               | 19.3 |
| SVA        | 2,667       | 44.4                 | 28.8  | 4.83               | 9.9  |
| HERVK      | 126         | 11                   | 8.23  | 1.86               | 2.12 |
| Total      | 36,699      | 1,236                | 1,040 | 30                 | 178  |

89 On average, we detected 1,236 MEIs with each genome in the NyuWa dataset and 1,040  
90 MEIs in the 1KGP dataset (Table 1), which were expected as increased sequencing depth  
91 provides more power for MEI detection (Fig. S1C). The smaller correlation between MEI  
92 number and sequencing coverage in the NyuWa dataset than that of the 1KGP dataset reflected  
93 that MEI detection sensitivity was close to saturation in ~30X genomic coverage, consistent  
94 with the previous evaluation by the authors of MELT (Gardner et al. 2017). The distribution of  
95 MEI numbers per individual, MEI allele frequencies and length estimates largely fit the findings  
96 of previous studies (Fig. 1) (Gardner et al. 2017, 2019). About 70.7% MEIs are very rare (allele  
97 frequency < 0.1%), with over 30% singletons of all four MEI types (Fig. 1C; Fig. S1D). Since  
98 a large proportion of MEIs were individual-specific, we next sought to evaluate MEI discovery  
99 by increasing sample size. Through randomly down-sampling to different sizes with 100-

100 sample intervals, we estimated the total MEI variants and the increase of variants at different  
 101 sample sizes (Fig. S1E-I). As expected, we found that the number of all four MEI types  
 102 continued to rise with the increasing sample size, but the growth rate decreased. When looking  
 103 at the subfamilies of MEIs, we found that the distributions of active *Alu* and L1 MEIs were in  
 104 line with previous observations in humans (Gardner et al. 2017; Bennett et al. 2008; Stewart et  
 105 al. 2011; Hormozdiari et al. 2013), e.g. *AluYa5* and *AluYb8* were found to be the most abundant  
 106 two *Alu* subfamilies (Fig. S3), indicating their high retrotransposition activity in modern  
 107 humans.

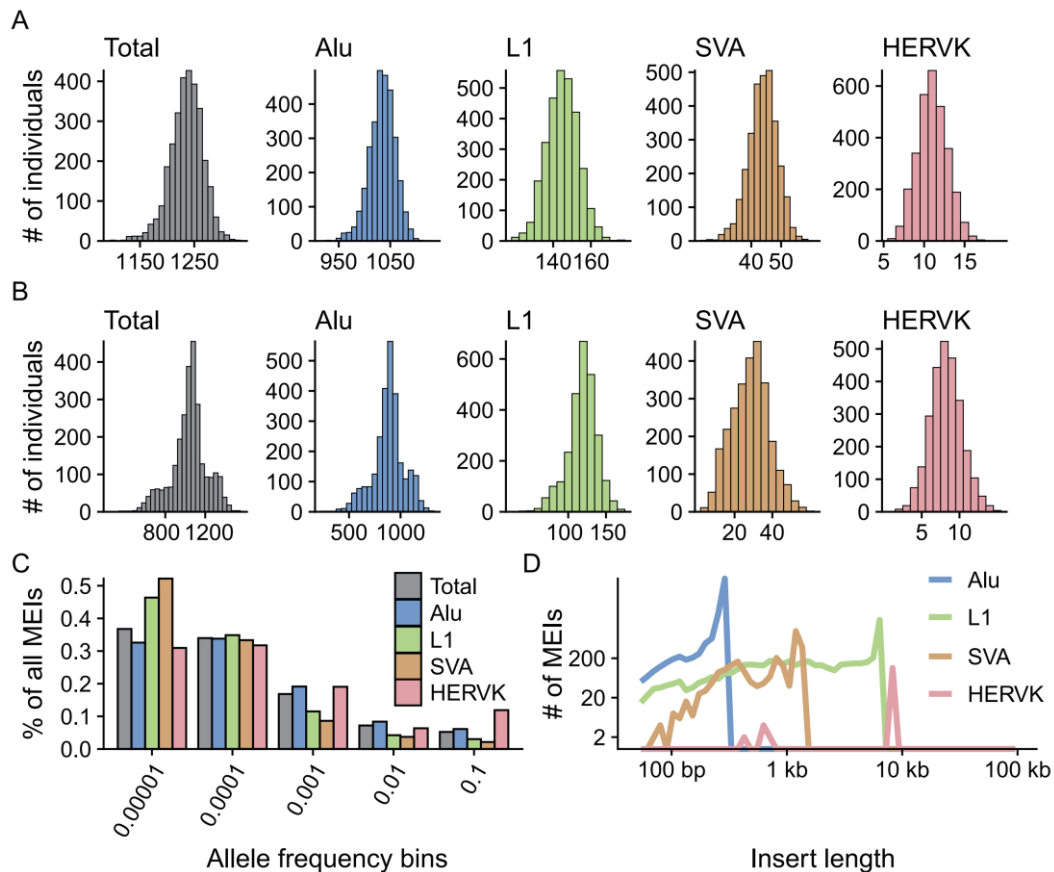

108  
 109 **Fig. 1. The MEI call set.** (A) Histograms of the number of MEIs identified per genome in the NyuWa  
 110 dataset. (B) Histograms of the number of MEIs identified per genome in the 1KGP dataset. (C)  
 111 Distribution of allele frequency of MEIs of four types: *Alu*, L1, SVA, and HERVK. “Total” combined  
 112 the four types of MEIs. (D) Distribution of insert size estimated by MELT.

113

114        Compared to the previous MEI findings of 1KGP samples (Gardner et al. 2017), the total  
115        number of non-reference MEIs we detected has increased 55.4%, with 45.2% and 74.0%  
116        increase for *Alu* and L1 insertions respectively (Fig. S4A). In addition, large proportions of  
117        MEI calls detected by previous study were repeatedly identified in this study, and the allele  
118        frequency for overlapping sites also showed high consistency (Fig. S4B; Pearson's correlation  
119        coefficient = 0.95). Nonetheless, we noticed that many MEIs identified by Gardner *et al.*  
120        (Gardner et al. 2017) were missed in our call set. We conjectured that this may be due to  
121        differences of software version, reference genome build, and the way how the BAM files were  
122        generated etc. To test this, we performed three runs using three sample sets: 1) 100 samples  
123        from the 1KGP with reads mapping to the GRCh37 genome build; 2) 100 samples from the  
124        1KGP with reads mapping to the GRCh38 genome build; 3) 100 samples from the 1KGP and  
125        100 samples from the NyuWa, with reads mapping to the GRCh38 genome build. We found  
126        that more MEIs could be detected by using the GRCh38 genome build and/or by combining  
127        more samples (Table S2). This is also in line with the model used by MELT (Gardner et al.  
128        2017), combining the 1KGP dataset with the high-coverage NyuWa dataset would improve  
129        MEI detection sensitivity as well as accuracy, with finer resolution of MEI break points.  
130        Collectively, our MEI call set represents a high-quality map of non-reference MEIs for humans.

### 131        **Enrichment of Non-reference L1 insertions in Centromeres**

132        It has been long noted that L1s occur preferentially in AT-rich regions but *Alus* show the  
133        opposite trend (Lander et al. 2001). As expected, we also observed this tendency for MEIs (Fig.

134 S5A). In addition, the GC content of flanking DNA for *Alus* and L1s were lower than  
135 background, while SVAs and HERV-Ks prefer DNA sequences with much higher GC content.  
136 We next compared the GC composition of rare MEIs (allele frequency < 1%) and common  
137 MEIs (allele frequency  $\geq$  1%) due to the reported bias shift in GC bias for older and younger  
138 short interspersed nuclear elements (SINEs) (Smit 1999; Hormozdiari et al. 2013; Medstrand  
139 et al. 2002; Waterson et al. 2005). Significant difference was only observed for HERV-K: rare  
140 HERV-K insertions occurred in much higher density at GC-rich regions (Fig. S5B). We did not  
141 observe marked bias for *Alus* and SVAs, likely because most insertions we identified were  
142 already fixed in population.

143 We next sought to investigate the distribution of MEIs throughout the genome, like  
144 previously Collins *et al.* had done for common SVs (Collins et al. 2020). Interestingly, L1s were  
145 predominantly enriched at centromeric regions, whereas SVAs and HERV-Ks were enriched at  
146 telomeres (Fig. 2 A and B; Fig. S6). For comparison, similar analysis was applied to TEs in the  
147 reference genome, but no such patterns for L1s were found (Fig. S7B). Even in the latest  
148 telomere-to-telomere assembly of the human X chromosome, only a single L1 insertion was  
149 detected at the centromere region (Miga et al. 2020). When restricted to singleton L1 MEIs, we  
150 could still detect the enrichment in centromeres (Fig. 2C). Importantly, this finding was well-  
151 supported by non-reference L1s from euL1db (Fig. 2D) (Mir et al. 2015), which curated human  
152 polymorphic L1s from 32 different studies. Considering the reduced detection power of short-  
153 read WGS in repetitive regions, the enrichment of L1 insertions at centromeric regions could  
154 be still underestimated. The enrichment of non-reference L1 insertions at centromeric DNA  
155 could be partly attributed to lower GC content, as centromeres contain massive AT-rich alpha



156 satellites (Manuelidis and Wu 1978). Also, active TEs have been found in neocentromere  
157 regions, and may contribute to centromere ontogenesis (Klein and O'Neill 2018; Contreras-  
158 Galindo et al. 2013; Zahn et al. 2015). The reasons for the dramatic enrichment of L1s in  
159 centromere regions are intriguing and further studies are needed in the future.

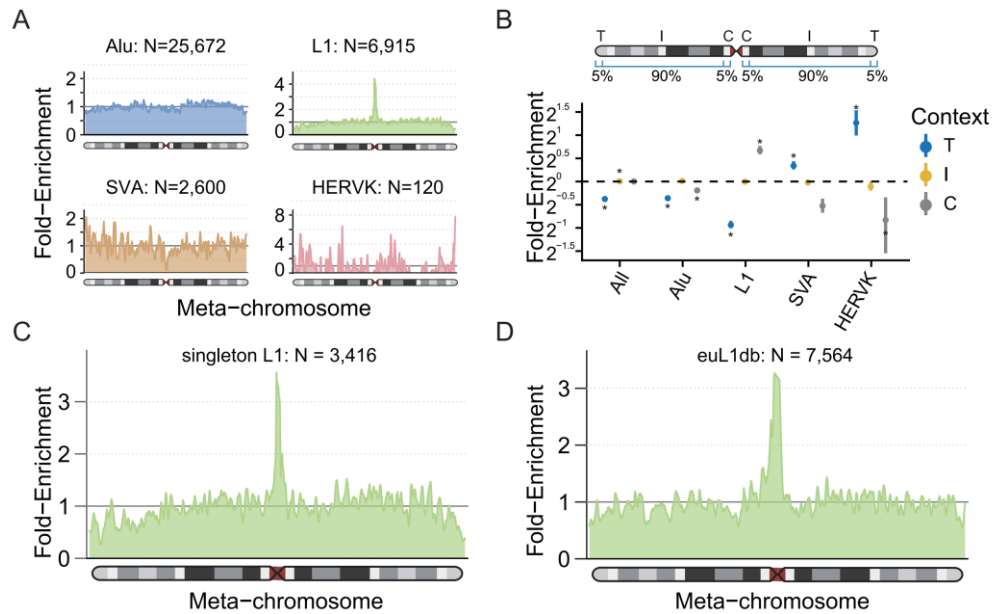

160

161 **Fig. 2. Chromosome-level Distribution of MEI Density.** (A) Smoothed enrichment of different types  
162 of MEIs ascertained in this study. The values were calculated per 100 kb window across the average of  
163 all autosomes and normalized by the length of chromosome arms (as “meta-chromosome”). (B)  
164 Enrichment of MEIs by class and chromosomal context. The dots are the mean values and point ranges  
165 represent 95% confidence intervals (CIs). P-values were computed using a two-sided t-test and adjusted  
166 using the Bonferroni method. \*,  $p \leq 0.05$ . C, centromeric; I, interstitial; T, telomeric. The way to compute  
167 the chromosomal enrichment and to represent data was from the gnomAD SV paper (Collins et al. 2020).  
168 (C) Smoothed enrichment of singleton L1s (L1 MEIs found in single genome) ascertained in this study.  
169 (D) Smoothed enrichment of non-reference L1s from euL1db database (Mir et al. 2015).

## 170 **Strong Correlations between MEI Diversity and SNP Heterozygosity**

171 Since mutations are ultimate sources of genetic innovation and significant causes of human  
172 birth defects and diseases, knowledge of mutation rate is a general population genetics question  
173 (Kumar and Subramanian 2002; Feusier et al. 2019). Here we employed the commonly-used  
174 Watterson's estimator (Watterson 1975) of  $\Theta$  to estimate the mutation rate of each MEI type and  
175 found that mutation rates varied markedly by MEI class (Table S3). Since MEI detection and  
176 genotyping power is profoundly influenced by sample coverage (Gardner et al. 2017), we  
177 conducted the analysis separately for the NyuWa and the 1KGP datasets. The resulting  
178 calculation provided very close estimates of between  $3.217 \times 10^{-11}$  (NyuWa) and  $2.928 \times 10^{-11}$   
179 (1KGP) de novo MEIs per bp per generation ( $\mu$ ), or roughly one new MEIs genome-wide every  
180 11-16 live births, which is largely concordant with prior reports (Sudmant et al. 2015; Gardner  
181 et al. 2019).

182 The availability of SNP genotyping (both the NyuWa and the 1KGP dataset) for the same  
183 samples given us an opportunity to investigate the correlation between MEI diversity and SNP  
184 heterozygosity for each population. SNP heterozygosity was computed as the ratio of  
185 heterozygous SNPs across the individual's genome (Prado-Martinez et al. 2013) and was  
186 compared to the average MEI differences between samples in a given population (Hedges et al.  
187 2004). The diversity for all types of MEIs showed strong correlation with SNP heterozygosity  
188 ( $R^2$ : 0.64~0.95), with African populations showing the highest MEI diversity and SNP  
189 heterozygosity (Fig. 3) — consistent with previous study (Stewart et al. 2011).

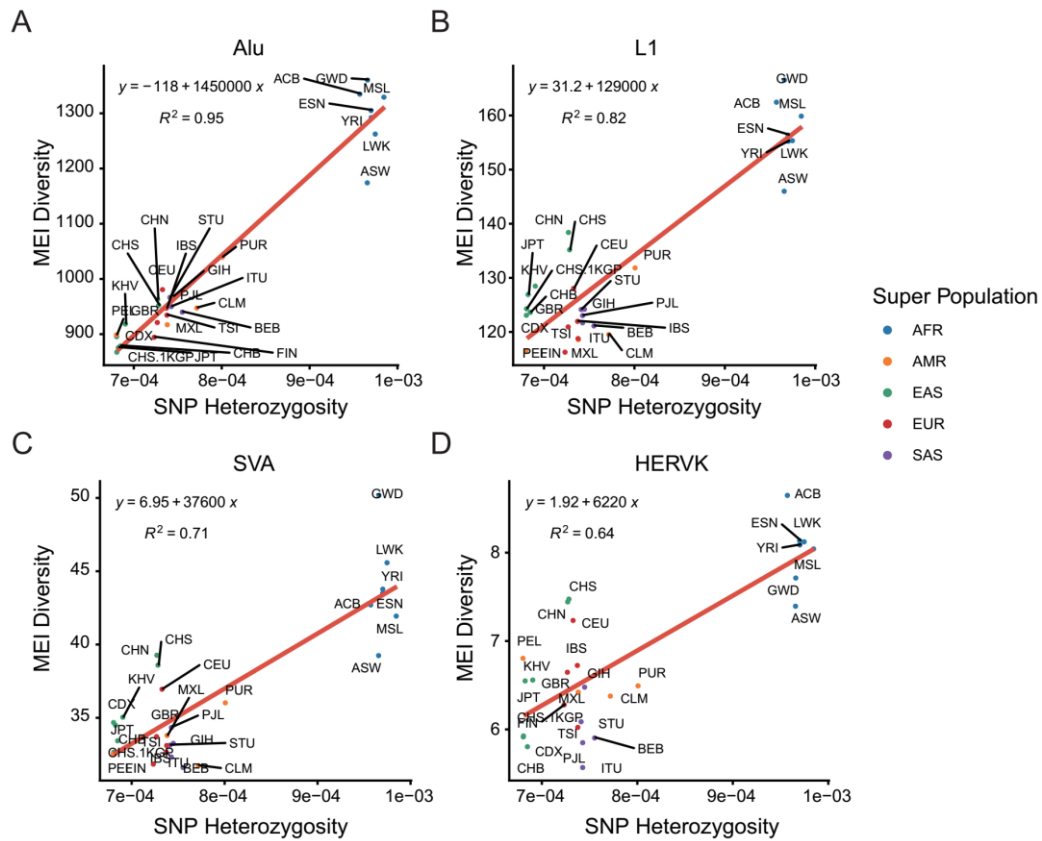

190

191 **Fig. 3. Correlation between SNP heterozygosity and MEI diversity.** SNP heterozygosities and  
 192 diversity of (A) *Alu* MEIs, (B) L1 MEIs, (C) SVA MEIs and (D) HERV-K MEIs were compared in  
 193 different populations. SNP heterozygosity was computed as the ratio of heterozygous SNPs across the  
 194 individual's genome and MEI diversity was computed as the average allele difference in each population.  
 195 Points were colored by super populations. AFR, African super population; AMR, American super  
 196 population; EAS, East Asian super population; EUR, European super population; SAS, South Asian  
 197 super population.

### 198 MEI Functional Properties

199 Via the local impacts by transposition events or more global post-insertion influence (Klein and  
 200 O'Neill 2018), MEIs can disrupt normal gene functions and be disease-causing (Payer and  
 201 Burns 2019; Hancks and Kazazian 2016). In principle, any MEIs can result in predicted loss-

202 of-function (pLoF) by altering open-reading frames. To assess the functional impacts of MEIs,  
203 we annotated the MEI calls using Variant Effect Predictor (VEP) and BEDtools (see Methods).  
204 The vast majority (82.7%) of detected MEIs was in intergenic and intronic regions, while only  
205 ~2.7% MEIs impacted the coding sequences (CDS) (Fig. 4A). Varying enrichment levels on  
206 different genomic features were observed for different MEI types (Fig. 4B). For example, L1,  
207 SVA and HERV-K MEIs were significantly depleted in CDS and non-coding gene exons; L1  
208 MEIs were enriched in coding introns and gene flanking regions; SVA and HERV-K sites were  
209 enriched in intergenic and non-coding introns. Focusing on protein-truncating variants (PTVs),  
210 each genome contained a mean of 24.8 MEIs (12.6 *Alu*, 7.4 L1, 1.3 SVA and 2.4 HERV-K)  
211 directly disrupting CDS, including 1.1 rare pLoF MEIs (allele frequency < 1%) (Fig. 4C; Table  
212 S4). By comparison, Karczewski *et al.* estimated 98.9 pLoF short variants (SNVs and InDels)  
213 per genome (Karczewski *et al.* 2020), and Collins *et al.* observed 144.3 pLoF SVs per genome  
214 (Collins *et al.* 2020). We thus estimated that MEIs account for about 9.3% (24.8/268) of all  
215 PTVs, among small variants and large SVs in each human genome.

216 Examining the degree to which evolutionary forces acting on coding MEI loci is important  
217 to understand the relationships between MEI variation and coding genes. Here we used three  
218 different metrics to investigate selective constraints: 1) the proportion of singleton variants  
219 (variants observed in only one individual), an established proxy for selection strengths (Lek *et*  
220 *al.* 2016); 2) the proportion of MEIs in genes with high probability of loss-of-function  
221 intolerance (pLI) (Lek *et al.* 2016); 3) the loss-of-function observed/expected upper bound  
222 fraction (LOEUF) of MEI-containing coding genes, where higher LOEUF scores suggest a  
223 relatively higher tolerance to inactivation for a given gene (Karczewski *et al.* 2020). HERV-K

224 MEI was not included in this analysis due to the relatively small number found in coding genes.  
225 Higher singleton proportions for *Alu* and L1 MEIs were found in CDS than that of introns (Fig.  
226 4D;  $\chi^2$   $p < 0.05$ ), while we did not find a statistically significant bias for SVA MEIs, though  
227 there were 166 and 949 SVA insertions found in CDS and coding introns, respectively. Likewise,  
228 lower proportions of *Alu*/L1 MEIs detected in genes with high pLI score ( $> 0.9$ ) were found in  
229 CDS than that of intronic regions (Fig. 4E;  $\chi^2$   $p < 0.05$ ). Observations from the perspective of  
230 enclosing genes fit these results: higher LOEUF score were found for genes with *Alu*/L1 MEIs  
231 (Fig. 4F, Wilcoxon  $p < 0.05$ ). Our results sustained and expanded previous findings on human  
232 exome data (Gardner et al. 2019), in which Gardner *et al.* reported that exonic MEIs were under  
233 purifying selection.

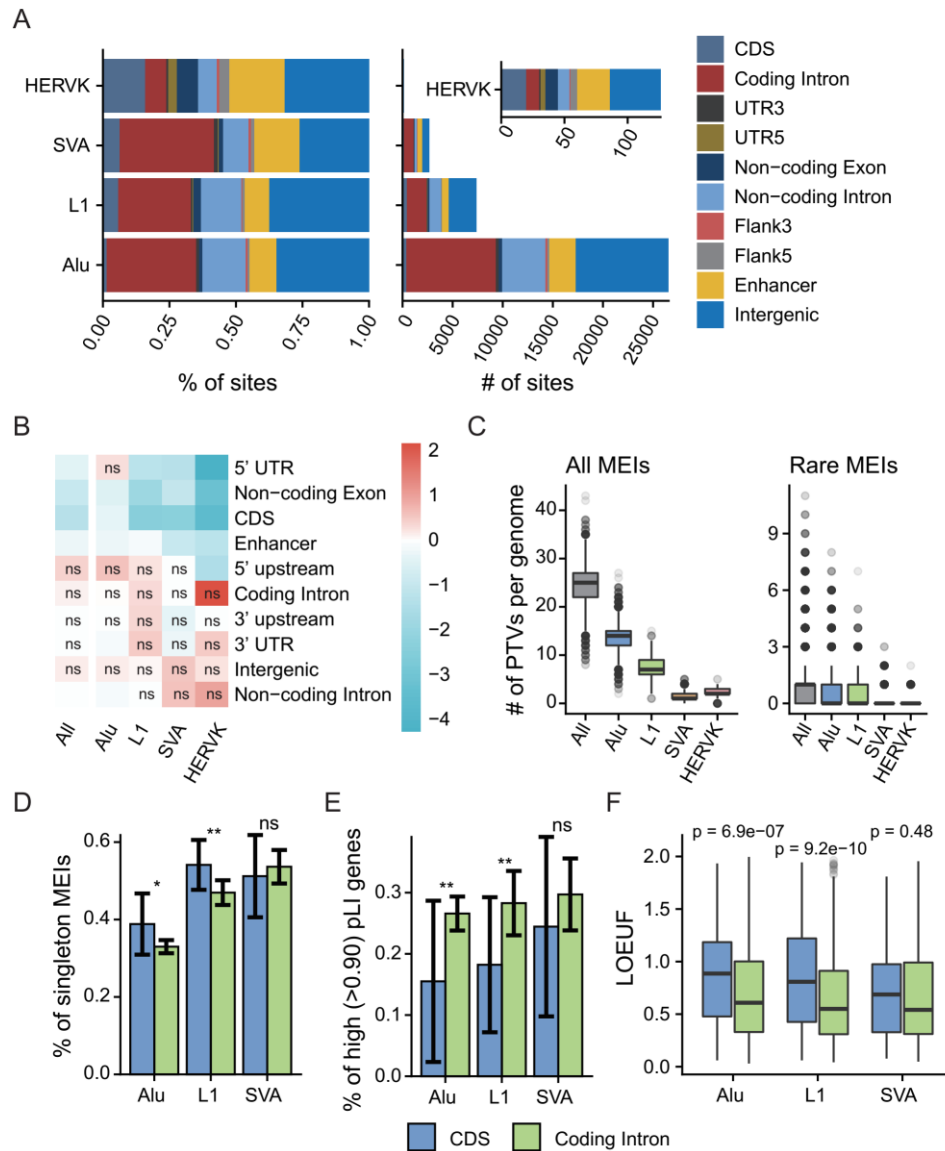

234

235 **Fig. 4. MEI functional properties.** (A) Predicted functional consequences for each type of MEI: (left)

236 cumulative proportion, and (right) cumulative number. (B) Log<sub>2</sub> fold enrichment of the MEI call set

237 compared against the MEIs permuted. The permutation test was repeated 1000 times, and empirical p-

238 values were commutated together with the enrichment values. The enrichment values were scaled row-

239 wise. ns, not significant (p-value > 0.05). (C) Box plots of counts of predicted PTVs by MEI: (left) all

240 the MEIs identified in this study, and (right) rare MEIs (allele frequency < 1%) in this study. (D)

241 Proportions of singleton MEIs in CDS and coding introns for *Alu*, *L1* and *SVA*. Error bars indicate 95%

242 CIs based on population proportion. P-values were computed using chi-squared test. (E) Proportions of

243 high pLI genes ( $pLI > 0.9$ ) for genes with MEIs in the CDS and genes with MEIs in intron regions. Error  
244 bars represent 95% CIs based on population proportion. P-values were computed using chi-squared test.  
245 (F) Box plots of LOEUF scores of genes with MEIs in the CDS and genes with MEIs in their introns.  
246 Wilcoxon rank sum test was used to compute p-values. Figure D-F used the same legend beneath. ns,  $p$   
247  $\geq 0.05$ ; \*,  $p < 0.05$ ; \*\*,  $p < 0.01$ .

248

249 Although researchers have long noted that most of reference LTR elements and L1s in  
250 gene introns are in the antisense orientation with respect to the host genes (Smit 1999;  
251 Medstrand et al. 2002), possibly due to ill effects on transcript processing of sense-oriented  
252 elements (van de Lagemaat et al. 2006; Zhang et al. 2011), there are no established conclusions  
253 about the orientation tendency of non-reference MEIs (Gardner et al. 2019; Hormozdiari et al.  
254 2013). Our large collection of MEIs found in genes allowed us to closely examine the strand  
255 bias of different MEIs. Although a bias for *Alu*, L1 MEIs and SVA MEIs to be in an antisense  
256 orientation when found within genes was observed (Hormozdiari et al. 2013), we did not find  
257 a statistically significant bias for L1 insertions (Fig. S8A). Conversely, *Alus* were found to have  
258 strong strand bias when being inserted into protein-coding genes, non-coding genes, protein-  
259 coding introns, and non-coding introns (Fig. S8;  $\chi^2 p < 0.05$ ). For SVA MEIs, protein-coding  
260 genes, protein-coding exons, and protein-coding introns were regions where insertion  
261 orientation biases were detected (Fig. S8;  $\chi^2 p < 0.05$ ). Considering that *Alu* and SVA elements  
262 are non-autonomous TEs that are trans-mobilized by the L1 retrotransposition machinery  
263 (Dewannieux et al. 2003; Raiz et al. 2012), there may be some post-insertion selection forces  
264 on *Alu*/*SVA* elements which influence these patterns (Sultana et al. 2017). The genes themselves

265 which had MEIs in sense or antisense strand in introns did not show clear differences in terms  
266 of selective constraints, by comparing the LOEUF scores of these two kinds genes (Fig. S8F).  
267 In addition, no significant orientation tendency against the neighboring genes were detected  
268 when MEIs were in gene upstream regions (Fig. S8I).

269 *Alu* MEIs have been found to be enriched in regions of genome associated with human  
270 disease risk, suggesting their potential effects on common diseases (Payer and Burns 2019;  
271 Payer et al. 2017). To identify MEIs potentially associated with human trait or disease, we  
272 mapped MEIs to regions in linkage disequilibrium (LD) with trait- or disease-associated loci  
273 identified by genome-wide association study (GWAS) ( $P < 10^{-8}$ ) (Buniello et al. 2019). We  
274 found that 6,457 (about 17.6%) of the MEIs (17.5% for *Alu*, 15.3% for L1, 24.4% for SVA, and  
275 16.6% for HERV-K) were in these regions that tagged by at least by one GWAS SNP (Table  
276 S5), with allele frequency of 738 MEIs over 1%, suggesting the remarkable potential for MEIs  
277 to contribute in disease and the utility of our MEI set in future phenotype-variant association  
278 studies.

### 279 **L1 3' Transduction and 5' Inversion**

280 Some L1 elements can bring a 3' readthrough transcript to the offspring insert site, which is  
281 called 3' transduction (Goodier et al. 2000). These L1 elements are usually near a strong Poly(A)  
282 sequence. Transcription of these L1 elements is not terminated by the original weak Poly(A) of  
283 the L1 element but by the stronger poly(A) sequence downstream. With the flanking sequences  
284 downstream L1 elements, we extracted the correspondence between L1s in different genomic  
285 positions. Totally, 446 offspring MEIs derived from 57 source MEIs were identified in our



286 samples. These MEI relationships are both interchromosomal and intrachromosomal (Fig. 5A).  
287 Compared with L1 transduction source sites identified by 1KGP study (Gardner et al. 2017),  
288 we found most of the sites were overlapped (Fig. 5B). Among these sites, 2 of the 3 most active  
289 source sites (chr6:13190802, chr1:118858380) were also found in this study, while the site  
290 *LIRE3* (chr2: 155671336) is in a low complexity region and was filtered in the site filtering.  
291 Most of the sources transducts less than 20 offspring whereas site chrX:11713279 has 186  
292 offspring (41% of all offspring detected). Source and offspring MEIs were distributed into  
293 families and population frequency was calculated (Fig. 5C and D). Most transduction classes  
294 were EAS specific. Comparing frequencies among subpopulations of EAS, we noticed 14  
295 transduction classes only detected in Chinese people. Inside these classes, 5 classes only appear  
296 in samples of Northern Han Chinese (CHB, CHN) and 4 classes only appear in Southern Han  
297 Chinese (CHS, CHS.1KGP) (Table S6).

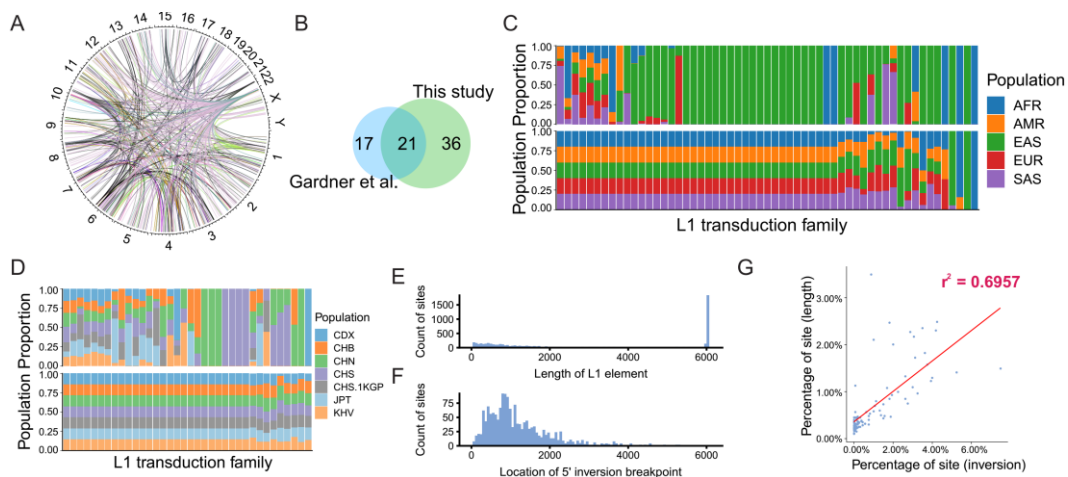

298

299 **Fig. 5. L1 3' Transduction and 5' Inversion.** (A) 3' transduction source-offspring relations across the  
300 whole genome. (B) Venn plot of 3' transduction sources found by our study and the 1KGP study (Gardner  
301 et al. 2017). (C) Source (bottom) and offspring (top) element frequencies in super populations. AFR,  
302 African super population; AMR, American super population; EAS, East Asian super population; EUR,

303 European super population; SAS, South Asian super population. (D) Source (bottom) and offspring (top)  
304 element frequencies in Asian subpopulations. CDX, Chinese Dai in Xishuangbanna; CHB, Han Chinese  
305 in Beijing; CHN, Northern Han Chinese, China; CHS, Southern Han Chinese; CHS.1KGP, Southern Han  
306 Chinese from the 1KGP; JPT, Japanese in Tokyo; KHV, Kinh in Ho Chi Minh City. (E) L1 length  
307 distribution within our call set. The length was estimated by MELT. (F) 5' inversion position distribution  
308 among all inverted sites. (G) Correlation plot between the distributions shown in (E) and (F). Full length  
309 L1 element was excluded in this comparison.

310

311 5' end of the L1 sequence can be inverted during insertion (Ostertag and Kazazian 2001).  
312 We extracted the 5' inversion information from the MELT result, and 1,606 L1 insertions were  
313 detected with a 5' inversion end. The nearest distance from the 5' inversion site to the 3' end of  
314 the L1 insertion is 602 bp, which is consistent with the 1KGP study (590 bp) (Gardner et al.  
315 2017). It seems that inversion does not occur in the first ~600 bp from the 3' end, which may  
316 indicate that the inversion process requires at least ~600 bp DNA sequence. In the previous  
317 study, the distribution of the 5' inversion positions highly correlated with the distribution of L1  
318 MEI lengths. MEIs in our study also showed this trend ( $R^2 = 0.696$ ; Fig. 5E-G). We next  
319 calculated the percentage of 5' end inverted MEIs within each 3' transduction offspring class.  
320 The inversion rate across different classes varied and did not correlate with the class size (Table  
321 S7). For the biggest class which derived from chrX:11713279, only 25.3% of the offspring had  
322 5' inversion while a class which only includes 15 offspring had a 40% inversion rate.

## 323 A Database for Polymorphic MEIs

324 Currently, resources for polymorphic TE findings in human genomes are in high demand  
325 (Goerner-Potvin and Bourque 2018). There were two dedicated databases for polymorphic  
326 human MEIs: dbRIP (Wang et al. 2006) and euL1db (Mir et al. 2015). However, the former had  
327 not been updated since 2012 and the latter was only for human-specific L1 insertions. To fill  
328 this gap, we have designed a companion database named HMEID to archive MEIs identified in  
329 this study, and to comprehensively catalog the variants on allele frequencies in the NyuWa  
330 dataset and the 1KGP dataset. Besides, variant quality metrics and functional annotations are  
331 also presented. Compared to dbRIP, HMEID contained more MEIs; the number of L1 insertions  
332 in HMEID was comparable with that of euL1db (Fig. 6). Importantly, HMEID contained MEIs  
333 detected from samples of Han Chinese, which is the largest ethnic group in the world. We  
334 anticipated that this resource would facilitate the exploration of TE polymorphisms and benefit  
335 future researches on TEs as well as human genetics.

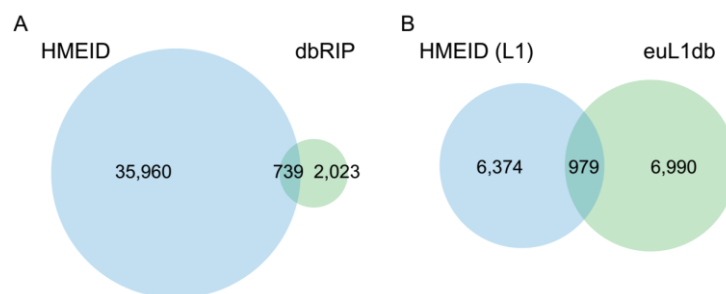

336

337 **Fig. 6. Comparing HMEID with other MEI Databases.** (A) Comparison the MEI set in the HMEID  
338 with that of from the dbRIP database (Wang et al. 2006). (B) Comparison the L1 MEIs in the HMEID  
339 with non-reference L1s from the euL1db database (Mir et al. 2015).

## 340 **Discussion**

341 MEIs, an endogenous and ongoing source of genetic variation, have not been investigated in  
342 many population-scale WGS projects. Here we leveraged 5,675 genomes from the NyuWa  
343 (Zhang et al. 2020) and the 1KGP (The 1000 Genomes Project Consortium 2015) dataset to  
344 identify non-reference MEIs. After describing the frequency spectrum of variants, we focused  
345 on the insertion site preference and functional impacts of MEIs. We provided an important  
346 resource of non-reference MEIs in humans.

347 We identified 36,699 non-reference MEIs for four types of TEs and determined that  
348 individuals harbour a mean of over 1,000 non-reference MEIs, mostly contributed by *Alu*  
349 insertions. In line with previous reports (Gardner et al. 2017, 2019; Stewart et al. 2011), most  
350 MEIs were rare and individual-specific, which was also observed for SNVs (The 1000  
351 Genomes Project Consortium 2015) and SVs (Collins et al. 2020). With the newly sequenced  
352 2,998 genomes from China, this study established a large-scale MEI resource for the genetics  
353 of Chinese as well as East Asians. Comparing to the previous study conducted by the 1KGP  
354 (Gardner et al. 2017), the number of MEIs detected by us has increased about 55%, representing  
355 what is to our knowledge the most comprehensive set of human non-reference MEIs.

356 We found that non-reference MEIs have non-random distributions along chromosomes,  
357 implicating the role of chromosome context in TE insertion. Of note, we found that non-  
358 reference L1 MEIs were drastically enriched in centromere regions, which was also supported  
359 by independent data from the euL1db (Mir et al. 2015). The genomic distribution of TEs is a  
360 result from insertion site preference and post-insertion selection on the host (Sultana et al. 2017).  
361 On the one hand, human centromeres are full of AT-rich alpha satellites (Manuelidis and Wu

362 1978), which could confer insertion preference for L1s, since the target specificity of L1  
363 insertion machinery is TTTT/A (Feng et al. 1996). Certain centromeric histones and other  
364 centromeric proteins may also serve as preferred targets for TEs, as suggested by a study in  
365 maize (Schneider et al. 2016). Additionally, studies on HIV integration into the host genome  
366 implied that proximity to the nuclear periphery of centromere may facilitate TE targeting (Lelek  
367 et al. 2015; Marini et al. 2015). On the other hand, incorporation of L1s may facilitate the  
368 recurring evolutionary novelty of centromeres (Klein and O'Neill 2018). In support of this,  
369 Chueh *et al.* reported that RNA transcripts from a full-length L1 are the essential structural and  
370 functional components in the regulation of a human neocentromere (Chueh et al. 2009).  
371 Evidences were also found in the tammar wallaby (*Macropus eugenii*), where dramatic  
372 enrichment of L1s and endogenous retroviruses was found in a latent centromere site (Longo  
373 et al. 2009), and *Equus caballus*, where evolutionarily new centromeres locate in LINE- and  
374 AT-rich regions (Nergadze et al. 2018). In addition to centromere ontogenesis, a LINE-like  
375 element (G2/jockey3) contributes directly to the organization and function of centromeres of  
376 *D. melanogaster* (Chang et al. 2019). This is also likely true for the non-reference SVA, for  
377 which we found an enrichment in telomeres, as TEs were found to be essential in maintaining  
378 the telomere length homeostasis in insects (Pardue and DeBaryshe 2011). However, another  
379 plausible explanation for both the enrichment of non-reference L1 MEIs in centromere and non-  
380 reference SVA MEIs in telomere is that these regions contain few protein-coding genes, limiting  
381 insertional mutagenesis by TEs (Sultana et al. 2017). The reasons for this phenomenon are  
382 fascinating, and our study post an important question about the relationship between TEs and  
383 centromeres.

384           Knowing the functional impact of MEIs is fundamental to our understanding the impact  
385 of MEI with respect to human disease or trait and evolution (Goerner-Potvin and Bourque 2018).  
386 We have estimated that MEIs accounted for about 9.3% of all protein-truncating variants per  
387 genome, among small variants (Karczewski et al. 2020) and SVs (Collins et al. 2020). Our  
388 estimation was much higher than that determined by whole exome sequencing data (Gardner et  
389 al. 2019), possibly due to the limitation of exome baits. We found that a significant portion of  
390 polymorphic MEIs mapping to loci implicated in trait/disease association by GWAS, as  
391 increasingly recognized by recent studies (Payer et al. 2017; Wang et al. 2017). While previous  
392 GWAS have mainly focused on small variants (Visscher et al. 2017), future association studies  
393 should consider and evaluate the effects of MEIs in common disease. We anticipate that the  
394 HMEID will serve as a basis for such studies.

395           Our study is limited in that only one tool was used to identify MEIs. Though the overall  
396 performance of MELT outperformed existing MEI discovery tools (Gardner et al. 2017) and it  
397 has been successfully used in several large-scale studies (Gardner et al. 2017, 2019; Feusier et  
398 al. 2019; Werling et al. 2018; Torene et al. 2020), but the detection power could be compromised  
399 by modest sequencing depth and incompetence in complex genomic regions of short-read WGS  
400 *etc.* In addition, the overall genotyping accuracy by MELT v2 was 87.95% for non-reference  
401 *Alus* (not excluding MEIs in low complexity regions), when compared with PCR generated  
402 genotypes (Goubert et al. 2020). As such, we have tried to ensure the site quality by strict  
403 filtering. In the future, we would consider combining different MEI identification and  
404 genotyping tools to improve the quality, which has been proved useful in previous reports  
405 (Ewing 2015; Goerner-Potvin and Bourque 2018; Rishishwar et al. 2016; Feusier et al. 2019).

406 Also, long-read WGS is promising in detecting MEIs, especially for genomic regions refractory  
407 to approaches using short-read sequencing technologies (Audano et al. 2019; Chaisson et al.  
408 2019; Zhou et al. 2020). Another limitation of our MEI dataset is that reference MEIs (MEIs  
409 detected as deletions) were not included yet, for which the detection is underway and the results  
410 would be integrated into the HMEID for public use.

## 411 **Methods**

### 412 **Experimental design**

413 Data in this study were from two sources: low-coverage (~7.4X) WGS samples from the 1KGP  
414 (The 1000 Genomes Project Consortium 2015) and high-coverage (~26.2X) WGS samples  
415 from the NyuWa dataset (Zhang et al. 2020). For the 1KGP dataset, CRAM-format files of  
416 2,691 individuals were downloaded from  
417 [http://ftp.1000genomes.ebi.ac.uk/vol1/ftp/data\\_collections/1000\\_genomes\\_project/](http://ftp.1000genomes.ebi.ac.uk/vol1/ftp/data_collections/1000_genomes_project/), which  
418 were aligned to human genome build GRCh38 (Lowy-Gallego et al. 2018). The CRAM files  
419 were then converted to BAMs using SAMtools v1.9 (Li et al. 2009). The NyuWa dataset  
420 contained 2,999 individuals including diabetes and control samples collected from different  
421 provinces in China (Zhang et al. 2020), and this cohort was sequenced using the Illumina  
422 platform. The processing from raw FASTQs to BAMs was according to the GATK Best  
423 Practices Workflows germline short variant discovery pipeline (Poplin et al. 2018), as described  
424 in (Zhang et al. 2020). The median depth of the NyuWa samples after genome alignment  
425 (GRCh38 human genome build) and removal of PCR duplicates was about 26.2X.

## 426 **Generation of MEI call set**

427 MELT v2.15 (Gardner et al. 2017) was run with default parameters using “SPLIT” mode to  
428 identify non-reference MEIs, which detects a wide range of non-reference *Alu*, L1, SVA and  
429 HERV-K insertions. To get the BAM coverage for MELT analysis, we used goleft v0.1.8  
430 (<https://github.com/brentp/goleft>) “covstats” function to estimate the genomic coverage for  
431 each sample. After initial generation of a unified VCF file by MELT “MakeVCF” function,  
432 variants that did not pass the following criteria were filtered to get a high-quality MEI call set:  
433 1) not in low complexity regions; 2) be genotyped in greater than 25.0% of individuals; 3) split  
434 reads > 2; 4) MELT ASSESS score > 3; and 5) VCF FILTER column be PASS. 2,998 of 2,999  
435 samples in NyuWa and 2,677 of 2,691 samples in 1KGP were successfully analyzed, with the  
436 final call set consisting of 36,699 MEIs from 5,675 genomes. Subfamily characterization for  
437 *Alu* MEIs and L1 MEIs was done using MELT’s CALU tool.

## 438 **Detection of L1 3’ transduction and 5’ inversion**

439 Following the generation of a high-quality MEI call set, MELT v2.15 was used to detect L1 3’  
440 transduction. We followed the instruction of MELT 3’ transduction identification pipeline and  
441 extracted the METRANS and MESOURCE field in the resulting VCF manually. The  
442 population frequency was calculated with the AC/AN (for offspring MEI set, we used the sum  
443 of AC and AN) and normalized across different populations.

444 The MELT VCF provided the position of a 5' inversion site (from the 3' end) through the  
445 “ISTP” field. We subtracted it from the full length of L1 (6,019 bp) to obtain the coordinate of  
446 the inversion site from the 5' end. While comparing the inversion coordinate and the length of



447 L1, we removed the full-length L1 elements from the comparison set. Sites were distributed  
448 into 100 bins across the full length of L1. We compared the distribution of sequence length and  
449 inversion site position among these bins and calculated the Pearson correlation value.

## 450 **Analysis of Hardy-Weinberg equilibrium**

451 To evaluate the genotype distributions of each MEI under the null expectations set by the  
452 Hardy-Weinberg equilibrium (HWE), we tabulated genotype distributions of autosomal MEIs  
453 per dataset and performed exact tests by “HWExactStats” function in R package  
454 HardyWeinberg v1.6.3 (Graffelman 2015). While disequilibrium may indicate disease  
455 association or population stratification, it may be the result of confusion of heterozygotes and  
456 homozygotes. We thus used the HWE test for gross quality-check of genotyping accuracy (Fig.  
457 S2), as described in (Collins et al. 2020).

## 458 **Comparison with the 1KGP MEI call set**

459 To compare with the MEIs generated by the 1KGP (Gardner et al. 2017), we downloaded the  
460 GRCh38 version call set from the dbVar database (Lappalainen et al. 2013). Then non-reference  
461 MEIs were extracted and compared with the MEIs identified in this study, using “window”  
462 function from BEDtools v2.26.0 (Quinlan and Hall 2010). When a site was located in  $\pm 500$  bp  
463 of another site, it was considered as a hit.

## 464 **Testing MELT for different genome build and joint calling**

465 To test MELT’s performance on different genome build, we randomly generated 100 samples  
466 from the 1KGP dataset, and we got the alignment files for both GRCh37 and GRCh38 version

467 for these samples. After which we ran MEIL v2.15 on the two dataset and filtered sites as  
468 mentioned above. Finally, we compared the results using the function “intersect” from  
469 BEDtools v2.26.0 (Quinlan and Hall 2010).

470 To test MELT’ performance with respect to sample size (joint calling), we randomly  
471 generated 100 samples from the NyuWa dataset and combined with the 100 random samples  
472 from the 1KGP above. Then we identified MEIs using the same pipeline as before on these 200  
473 samples. After which we compared the call set with the MEIs detected from the 100 samples  
474 from the 1KGP with BEDtools “intersect”.

## 475 **Functional annotation**

476 Variant Effect Predictor v99.2 (VEP) (McLaren et al. 2016) with Ensembl database version 99  
477 (Zerbino et al. 2018) was used to annotate MEIs, with parameters “--pick --canonical --distance  
478 1000,500”. MEIs were also intersected with enhancers from GeneHancer database (Fishilevich  
479 et al. 2017) using BEDtools v2.26.0 “intersect” function (Quinlan and Hall 2010). Only one  
480 functional consequence was kept for each MEI, and enhancers were given higher priority when  
481 a MEI was also found in non-coding genes and intergenic regions.

482 Mapping MEIs to the GWAS signals was done as described in a previous study (Payer et  
483 al. 2017). GWAS SNPs and their related traits were obtained from GWAS Catalog v1.0.2  
484 (Buniello et al. 2019). We first defined the LD block region for each GWAS SNP by its proxy  
485 SNPs ( $r^2 > 0.8$ ). The LD between all the SNPs was calculated using the SNP call set generated  
486 by 1KGP phase III (The 1000 Genomes Project Consortium 2015), with plink v2.00a1LM  
487 (Chang et al. 2015). If there was no LD SNPs found in either side of the GWAS SNP, we used

488 the median length of all predicted LD regions as the block length, centered by the target SNP.  
489 Then BEDtools v2.26.0 “intersect” function (Quinlan and Hall 2010) was employed to identify  
490 MEIs falling into these LD block regions. The complete set of these MEIs could be found in  
491 Table S5.

492 To qualify the enrichment of MEIs across different genomic features (Fig. 4B), we  
493 permuted 1,000 times for each MEI type with the same number as the real calls using GAT  
494 v1.3.4 (Heger et al. 2013). Each permutation set was annotated with VEP and BEDtools using  
495 the same rules as above. After counting the MEIs in each genomic feature, log<sub>2</sub> fold changes  
496 and empirical p-values were computed. We repeated 3 times of the permutation procedure to  
497 verify the results.

## 498 **Chromosome-level analyses of MEI density**

499 To check the distribution of MEIs throughout the genome, we used the method described by  
500 Collins *et al.* (Collins et al. 2020) and we repeated it here for clarity. Focusing on 22 autosomes,  
501 each chromosome was segmented into consecutive 100kb bins and bins overlapped with  
502 centromeres were removed. For each MEI type (*Alu*, L1, SVA and HERV-K), the number of  
503 variants in each bin was recorded to get a matrix of MEI counts per 100kb bins per autosome.  
504 To smooth the MEI counts for each MEI type, an 11-bin (~1Mb) rolling mean per chromosome  
505 was computed. Each bin was then assigned to a percentile based on the position of that bin on  
506 its respective chromosome arm relative to the centromere. Specifically, a value of 0  
507 corresponded to the centromere, and a value of -1 and 1 corresponded to the p-arm telomere  
508 and q-arm telomere, respectively. Finally, to compute “meta-chromosome” density shown in

509 Fig. 2, the normalized bin positions (i.e., -1 to 1) were cut into 500 uniform intervals, and values  
510 across all autosomes based on the normalized interval position were averaged. For the  
511 comparison of chromosome contexts (Fig. 2), normalized positions within the outermost 5% of  
512 each chromosome arm were considered as “telomeric”, the innermost 5% as “centromeric” and  
513 the other 90% of each arm as “interstitial”. Visualization of density of different MEIs on each  
514 chromosome shown in Fig. S6 was done using RIdeogram v0.2.2 (Hao et al. 2020).

## 515 **Mutation rates**

516 Before estimating mutation rate, we exclude the MEIs failed in the HWE test (adjusted  $p <$   
517 0.05). MEIs in low complexity regions (Li 2014) and in reference TE sequences were also  
518 filtered, due to the inability of MELT in these regions. Watterson’s Theta (Watterson 1975) was  
519 then used to estimate the genome mutation rate of each MEI type:

$$520 \quad \widehat{\theta}_w = \frac{K}{\sum_{i=1}^{n-1} \frac{1}{i}}$$

521 where  $K$  is the number of MEI site observed per MEI type in given population, and is the total  
522 number of chromosomes assessed. Then mutation rates were estimated as:

$$523 \quad \widehat{\theta}_w = 4N_e$$

524 with an effective population size (i.e.  $N_e$ ) of 10,000, consistent with previous studies (Sudmant  
525 et al. 2015; Gardner et al. 2019; Collins et al. 2020). To estimate mutation rates worldwide, the  
526 average mutation rate across all five continental populations was computed, with 95%  
527 confidence interval surrounding the mean based on t distribution (Collins et al. 2020).

## 528 **SNP heterozygosity and MEI diversity**

529 As described in a previous study (Hormozdiari et al. 2013), SNP heterozygosity was computed  
530 as the ratio of heterozygous SNPs over the length of the genome, and the mean value was used  
531 when multiple samples were considered. MEI diversity was defined as the average number of  
532 MEI differences between individuals in a population. For the NyuWa dataset (Zhang et al. 2020),  
533 high-quality SNP calls generated by the GATK v3.7 cohort pipeline (DePristo et al. 2011;  
534 Poplin et al. 2018) were used. For 1KGP3 samples, SNP calls on the human genome build  
535 GRCh38 of the were downloaded from  
536 [http://ftp.1000genomes.ebi.ac.uk/vol1/ftp/data\\_collections/1000\\_genomes\\_project/release/20190312\\_biallelic\\_SNV\\_and\\_INDEL/](http://ftp.1000genomes.ebi.ac.uk/vol1/ftp/data_collections/1000_genomes_project/release/20190312_biallelic_SNV_and_INDEL/). Number of heterozygous SNPs was computed by  
538 VCFtools v0.1.15 (Danecek et al. 2011) and MEI diversity by “gtcheck” function in BCFtools  
539 v1.3.1 (Danecek and McCarthy 2017).

## 540 **Database construction**

541 We constructed the database with Bootstrap and Django. For each population, we calculated  
542 allele frequency of each MEI. All the data can be browsed in the database and downloaded from  
543 the “Download” page.

## 544 **Statistical analysis**

545 All statistical analyses in this study were briefly described in the main text and performed using R  
546 v3.6.2 (<http://CRAN.R-project.org/>).

## 547 **Data Access**

548 Complete MEI call set and other related information such as allele frequency and functional  
549 annotation are available in the companion database HMEID (available at  
550 <http://bigdata.ibp.ac.cn/HMEID/>).

## 551 **Acknowledgments**

552 We thank Eugene J. Gardner for helping us in using MELT. We thank Jing Wang for valuable  
553 comments in the data analysis and critical review of the manuscript. We thank Tingrui Song for  
554 assisting the use of high-performance computing platforms. We thank the people for generously  
555 contributing samples and sequencing data to the NyuWa dataset and the 1KGP dataset. Data  
556 analysis and computing resources were supported by the Center for Big Data Research in Health  
557 (<http://bigdata.ibp.ac.cn>), Institute of Biophysics, Chinese Academy of Sciences. This work  
558 was supported by the National Key R&D Program of China [2016YFC0901702,  
559 2018YFA0106901]; National Natural Science Foundation of China [31871294, 31701117,  
560 31970647]; the 13th Five-year Informatization Plan of Chinese Academy of Sciences Grant  
561 [XXH13505-05].

## 562 **Author Contributions**

563 T.X. and S.M.H. conceptualized and supervised the project. Y.W.N., X.Y.T., Y.R.S., Y.Y.L.,  
564 Y.H.T. and Q.K. conducted data analysis. X.Y.T. built the database. Y.W.N., X.Y.T., H.X.L., P.Z.  
565 and S.M.H. drafted the manuscript, and all the primary authors reviewed, edited, and approved  
566 the manuscript.

## 567 **Disclosure Declaration**

568 The authors declare no competing interests.

## 569 **References**

570 Audano PA, Sulovari A, Graves-Lindsay TA, Cantsilieris S, Sorensen M, Welch AE, Dougherty ML,  
571 Nelson BJ, Shah A, Dutcher SK, et al. 2019. Characterizing the Major Structural Variant  
572 Alleles of the Human Genome. *Cell* **0**. [https://www.cell.com/cell/abstract/S0092-](https://www.cell.com/cell/abstract/S0092-8674(18)31633-7)  
573 [8674\(18\)31633-7](https://www.cell.com/cell/abstract/S0092-8674(18)31633-7) (Accessed January 21, 2019).

574 Bennett EA, Keller H, Mills RE, Schmidt S, Moran JV, Weichenrieder O, Devine SE. 2008. Active  
575 Alu retrotransposons in the human genome. *Genome Res* **18**: 1875–1883.

576 Buniello A, MacArthur JAL, Cerezo M, Harris LW, Hayhurst J, Malangone C, McMahon A,  
577 Morales J, Mountjoy E, Sollis E, et al. 2019. The NHGRI-EBI GWAS Catalog of published  
578 genome-wide association studies, targeted arrays and summary statistics 2019. *Nucleic*  
579 *Acids Res* **47**: D1005–D1012.

580 Cao Y, Li L, Xu M, Feng Z, Sun X, Lu J, Xu Y, Du P, Wang T, Hu R, et al. 2020. The ChinaMAP  
581 analytics of deep whole genome sequences in 10,588 individuals. *Cell Res* 1–15.

582 Chaisson MJP, Sanders AD, Zhao X, Malhotra A, Porubsky D, Rausch T, Gardner EJ, Rodriguez  
583 OL, Guo L, Collins RL, et al. 2019. Multi-platform discovery of haplotype-resolved  
584 structural variation in human genomes. *Nature Communications* **10**: 1784.

585 Chang CC, Chow CC, Tellier LC, Vattikuti S, Purcell SM, Lee JJ. 2015. Second-generation PLINK:  
586 rising to the challenge of larger and richer datasets. *Gigascience* **4**.  
587 <https://academic.oup.com/gigascience/article/4/1/s13742-015-0047-8/2707533> (Accessed  
588 June 29, 2019).

589 Chang C-H, Chavan A, Palladino J, Wei X, Martins NMC, Santinello B, Chen C-C, Erceg J,  
590 Beliveau BJ, Wu C-T, et al. 2019. Islands of retroelements are major components of  
591 *Drosophila* centromeres. *PLOS Biology* **17**: e3000241.

592 Chueh AC, Northrop EL, Brettingham-Moore KH, Choo KHA, Wong LH. 2009. LINE  
593 Retrotransposon RNA Is an Essential Structural and Functional Epigenetic Component of  
594 a Core Neocentromeric Chromatin. *PLOS Genetics* **5**: e1000354.

595 Collins RL, Brand H, Karczewski KJ, Zhao X, Alföldi J, Francioli LC, Khera AV, Lowther C,  
596 Gauthier LD, Wang H, et al. 2020. A structural variation reference for medical and  
597 population genetics. *Nature* **581**: 444–451.

598 Contreras-Galindo R, Kaplan MH, He S, Contreras-Galindo AC, Gonzalez-Hernandez MJ, Kappes

- 599 F, Dube D, Chan SM, Robinson D, Meng F, et al. 2013. HIV infection reveals widespread  
600 expansion of novel centromeric human endogenous retroviruses. *Genome Res* **23**: 1505–  
601 1513.
- 602 Cordaux R, Batzer MA. 2009. The impact of retrotransposons on human genome evolution. *Nature*  
603 *Reviews Genetics* **10**: 691–703.
- 604 Danecek P, Auton A, Abecasis G, Albers CA, Banks E, DePristo MA, Handsaker RE, Lunter G,  
605 Marth GT, Sherry ST, et al. 2011. The variant call format and VCFtools. *Bioinformatics* **27**:  
606 2156–2158.
- 607 Danecek P, McCarthy SA. 2017. BCFtools/csq: haplotype-aware variant consequences.  
608 *Bioinformatics* **33**: 2037–2039.
- 609 Deisinger PL, Moran JV, Batzer MA, Kazazian HH. 2003. Mobile elements and mammalian  
610 genome evolution. *Current Opinion in Genetics & Development* **13**: 651–658.
- 611 DePristo MA, Banks E, Poplin R, Garimella KV, Maguire JR, Hartl C, Philippakis AA, del Angel  
612 G, Rivas MA, Hanna M, et al. 2011. A framework for variation discovery and genotyping  
613 using next-generation DNA sequencing data. *Nat Genet* **43**: 491–498.
- 614 Dewannieux M, Esnault C, Heidmann T. 2003. LINE-mediated retrotransposition of marked Alu  
615 sequences. *Nature Genetics* **35**: 41–48.
- 616 Ewing AD. 2015. Transposable element detection from whole genome sequence data. *Mob DNA* **6**.  
617 <http://www.ncbi.nlm.nih.gov/pmc/articles/PMC4696183/> (Accessed May 29, 2017).
- 618 Feng Q, Moran JV, Kazazian HH, Boeke JD. 1996. Human L1 Retrotransposon Encodes a  
619 Conserved Endonuclease Required for Retrotransposition. *Cell* **87**: 905–916.
- 620 Feusier J, Watkins WS, Thomas J, Farrell A, Witherspoon DJ, Baird L, Ha H, Xing J, Jorde LB.  
621 2019. Pedigree-based estimation of human mobile element retrotransposition rates.  
622 *Genome Res* **29**: 1567–1577.
- 623 Fishilevich S, Nudel R, Rappaport N, Hadar R, Plaschkes I, Iny Stein T, Rosen N, Kohn A, Twik M,  
624 Safran M, et al. 2017. GeneHancer: genome-wide integration of enhancers and target genes  
625 in GeneCards. *Database (Oxford)* **2017**.  
626 <https://academic.oup.com/database/article/doi/10.1093/database/bax028/3737828>  
627 (Accessed November 27, 2018).
- 628 Gardner EJ, Lam VK, Harris DN, Chuang NT, Scott EC, Pittard WS, Mills RE, Consortium 1000  
629 Genomes Project, Devine SE. 2017. The Mobile Element Locator Tool (MELT):  
630 Population-scale mobile element discovery and biology. *Genome Res* gr.218032.116.
- 631 Gardner EJ, Prigmore E, Gallone G, Danecek P, Samocha KE, Handsaker J, Gerety SS, Ironfield H,  
632 Short PJ, Sifrim A, et al. 2019. Contribution of retrotransposition to developmental  
633 disorders. *Nat Commun* **10**: 1–10.



- 634 Goerner-Potvin P, Bourque G. 2018. Computational tools to unmask transposable elements. *Nature*  
635 *Reviews Genetics* **19**: 688–704.
- 636 Goodier JL. 2016. Restricting retrotransposons: a review. *Mobile DNA* **7**: 16.
- 637 Goodier JL, Ostertag EM, Kazazian Jr HH. 2000. Transduction of 3'-flanking sequences is common  
638 in L1 retrotransposition. *Human Molecular Genetics* **9**: 653–657.
- 639 Goubert C, Thomas J, Payer LM, Kidd JM, Feusier J, Watkins WS, Burns KH, Jorde LB, Feschotte  
640 C. 2020. TypeTE: a tool to genotype mobile element insertions from whole genome  
641 resequencing data. *Nucleic Acids Research*. <https://doi.org/10.1093/nar/gkaa074> (Accessed  
642 March 1, 2020).
- 643 Graffelman J. 2015. Exploring Diallelic Genetic Markers: The HardyWeinberg Package. *Journal of*  
644 *Statistical Software* **64**: 1–23.
- 645 Hancks DC, Kazazian HH. 2016. Roles for retrotransposon insertions in human disease. *Mob DNA*  
646 **7**. <https://www.ncbi.nlm.nih.gov/pmc/articles/PMC4859970/> (Accessed June 20, 2019).
- 647 Hao Z, Lv D, Ge Y, Shi J, Weijers D, Yu G, Chen J. 2020. RIdiogram: drawing SVG graphics to  
648 visualize and map genome-wide data on the idiograms. *PeerJ Comput Sci* **6**: e251.
- 649 Hedges DJ, Callinan PA, Cordaux R, Xing J, Barnes E, Batzer MA. 2004. Differential Alu  
650 Mobilization and Polymorphism Among the Human and Chimpanzee Lineages. *Genome*  
651 *Res* **14**: 1068–1075.
- 652 Heger A, Webber C, Goodson M, Ponting CP, Lunter G. 2013. GAT: a simulation framework for  
653 testing the association of genomic intervals. *Bioinformatics* **29**: 2046–2048.
- 654 Hormozdiari F, Konkel MK, Prado-Martinez J, Chiatante G, Herraes IH, Walker JA, Nelson B,  
655 Alkan C, Sudmant PH, Huddleston J, et al. 2013. Rates and patterns of great ape  
656 retrotransposition. *PNAS* **110**: 13457–13462.
- 657 Huang CRL, Burns KH, Boeke JD. 2012. Active Transposition in Genomes. *Annu Rev Genet* **46**:  
658 651–675.
- 659 Karczewski KJ, Francioli LC, Tiao G, Cummings BB, Alföldi J, Wang Q, Collins RL, Laricchia  
660 KM, Ganna A, Birnbaum DP, et al. 2020. The mutational constraint spectrum quantified  
661 from variation in 141,456 humans. *Nature* **581**: 434–443.
- 662 Klein SJ, O'Neill RJ. 2018. Transposable elements: genome innovation, chromosome diversity, and  
663 centromere conflict. *Chromosome Res* **26**: 5–23.
- 664 Kumar S, Subramanian S. 2002. Mutation rates in mammalian genomes. *PNAS* **99**: 803–808.
- 665 Lander ES, Linton LM, Birren B, Nusbaum C, Zody MC, Baldwin J, Devon K, Dewar K, Doyle M,  
666 FitzHugh W, et al. 2001. Initial sequencing and analysis of the human genome. *Nature* **409**:  
667 860–921.

- 668 Lappalainen I, Lopez J, Skipper L, Hefferon T, Spalding JD, Garner J, Chen C, Maguire M, Corbett  
669 M, Zhou G, et al. 2013. dbVar and DGVa: public archives for genomic structural variation.  
670 *Nucleic Acids Res* **41**: D936–D941.
- 671 Lek M, Karczewski KJ, Minikel EV, Samocha KE, Banks E, Fennell T, O’Donnell-Luria AH, Ware  
672 JS, Hill AJ, Cummings BB, et al. 2016. Analysis of protein-coding genetic variation in  
673 60,706 humans. *Nature* **536**: 285–291.
- 674 Lelek M, Casartelli N, Pellin D, Rizzi E, Souque P, Severgnini M, Di Serio C, Fricke T, Diaz-  
675 Griffero F, Zimmer C, et al. 2015. Chromatin organization at the nuclear pore favours HIV  
676 replication. *Nature Communications* **6**: 6483.
- 677 Li H. 2014. Toward better understanding of artifacts in variant calling from high-coverage samples.  
678 *Bioinformatics* **30**: 2843–2851.
- 679 Li H, Handsaker B, Wysoker A, Fennell T, Ruan J, Homer N, Marth G, Abecasis G, Durbin R. 2009.  
680 The Sequence Alignment/Map format and SAMtools. *Bioinformatics* **25**: 2078–2079.
- 681 Longo MS, Carone DM, Green ED, O’Neill MJ, O’Neill RJ, NISC Comparative Sequencing  
682 Program. 2009. Distinct retroelement classes define evolutionary breakpoints demarcating  
683 sites of evolutionary novelty. *BMC Genomics* **10**: 334.
- 684 Lowy-Gallego E, Fairley S, Zheng-Bradley H, Clarke L, Flicek P. 2018. Variant calling on the  
685 GRCh38 assembly with the data from phase three of the 1000 Genomes. *F1000Research* **7**.  
686 <https://f1000research.com/posters/7-1445> (Accessed May 18, 2020).
- 687 Manuelidis L, Wu JC. 1978. Homology between human and simian repeated DNA. *Nature* **276**: 92–  
688 94.
- 689 Marini B, Kertesz-Farkas A, Ali H, Lucic B, Lisek K, Manganaro L, Pongor S, Luzzati R, Recchia  
690 A, Mavilio F, et al. 2015. Nuclear architecture dictates HIV-1 integration site selection.  
691 *Nature* **521**: 227–231.
- 692 McLaren W, Gil L, Hunt SE, Riat HS, Ritchie GRS, Thormann A, Flicek P, Cunningham F. 2016.  
693 The Ensembl Variant Effect Predictor. *Genome Biology* **17**: 122.
- 694 Medstrand P, Lagemaat LN van de, Mager DL. 2002. Retroelement Distributions in the Human  
695 Genome: Variations Associated With Age and Proximity to Genes. *Genome Res* **12**: 1483–  
696 1495.
- 697 Miga KH, Koren S, Rhie A, Vollger MR, Gershman A, Bzikadze A, Brooks S, Howe E, Porubsky  
698 D, Logsdon GA, et al. 2020. Telomere-to-telomere assembly of a complete human X  
699 chromosome. *Nature* 1–9.
- 700 Mills RE, Bennett EA, Iskow RC, Devine SE. 2007. Which transposable elements are active in the  
701 human genome? *Trends in Genetics* **23**: 183–191.

- 702 Mir AA, Philippe C, Cristofari G. 2015. euL1db: the European database of L1HS retrotransposon  
703 insertions in humans. *Nucleic Acids Res* **43**: D43–D47.
- 704 Nergadze SG, Piras FM, Gamba R, Corbo M, Cerutti F, McCarter JGW, Cappelletti E, Gozzo F,  
705 Harman RM, Antczak DF, et al. 2018. Birth, evolution, and transmission of satellite-free  
706 mammalian centromeric domains. *Genome Res* **28**: 789–799.
- 707 Ostertag EM, Kazazian HH. 2001. Twin Priming: A Proposed Mechanism for the Creation of  
708 Inversions in L1 Retrotransposition. *Genome Res* **11**: 2059–2065.
- 709 Pardue M-L, DeBaryshe PG. 2011. Retrotransposons that maintain chromosome ends. *PNAS* **108**:  
710 20317–20324.
- 711 Payer LM, Burns KH. 2019. Transposable elements in human genetic disease. *Nat Rev Genet* **20**:  
712 760–772.
- 713 Payer LM, Steranka JP, Yang WR, Kryatova M, Medabalimi S, Ardeljan D, Liu C, Boeke JD,  
714 Avramopoulos D, Burns KH. 2017. Structural variants caused by Alu insertions are  
715 associated with risks for many human diseases. *PNAS* **114**: E3984–E3992.
- 716 Poplin R, Ruano-Rubio V, DePristo MA, Fennell TJ, Carneiro MO, Auwera GAV der, Kling DE,  
717 Gauthier LD, Levy-Moonshine A, Roazen D, et al. 2018. Scaling accurate genetic variant  
718 discovery to tens of thousands of samples. *bioRxiv* 201178.
- 719 Prado-Martinez J, Sudmant PH, Kidd JM, Li H, Kelley JL, Lorente-Galdos B, Veeramah KR,  
720 Woerner AE, O'Connor TD, Santpere G, et al. 2013. Great ape genetic diversity and  
721 population history. *Nature* **499**: 471–475.
- 722 Quinlan AR, Hall IM. 2010. BEDTools: a flexible suite of utilities for comparing genomic features.  
723 *Bioinformatics* **26**: 841–842.
- 724 Raiz J, Damert A, Chira S, Held U, Klawitter S, Hamdorf M, Löwer J, Strätling WH, Löwer R,  
725 Schumann GG. 2012. The non-autonomous retrotransposon SVA is trans -mobilized by the  
726 human LINE-1 protein machinery. *Nucleic Acids Res* **40**: 1666–1683.
- 727 Rishishwar L, Mariño-Ramírez L, Jordan IK. 2016. Benchmarking computational tools for  
728 polymorphic transposable element detection. *Brief Bioinform.*  
729 <https://academic.oup.com/bib/article/doi/10.1093/bib/bbw072/2562836> (Accessed  
730 October 31, 2017).
- 731 Schneider KL, Xie Z, Wolfgruber TK, Presting GG. 2016. Inbreeding drives maize centromere  
732 evolution. *PNAS* **113**: E987–E996.
- 733 Smit AF. 1999. Interspersed repeats and other mementos of transposable elements in mammalian  
734 genomes. *Current Opinion in Genetics & Development* **9**: 657–663.
- 735 Stewart C, Kural D, Strömberg MP, Walker JA, Konkel MK, Stütz AM, Urban AE, Grubert F, Lam

- 736 HYK, Lee W-P, et al. 2011. A Comprehensive Map of Mobile Element Insertion  
737 Polymorphisms in Humans. *PLoS Genet* **7**.  
738 <https://www.ncbi.nlm.nih.gov/pmc/articles/PMC3158055/> (Accessed March 10, 2020).
- 739 Sudmant PH, Rausch T, Gardner EJ, Handsaker RE, Abyzov A, Huddleston J, Zhang Y, Ye K, Jun  
740 G, Hsi-Yang Fritz M, et al. 2015. An integrated map of structural variation in 2,504 human  
741 genomes. *Nature* **526**: 75–81.
- 742 Sultana T, Zamborlini A, Cristofari G, Lesage P. 2017. Integration site selection by retroviruses and  
743 transposable elements in eukaryotes. *Nature Reviews Genetics* **18**: 292–308.
- 744 The 1000 Genomes Project Consortium. 2015. A global reference for human genetic variation.  
745 *Nature* **526**: 68–74.
- 746 Torene RI, Galens K, Liu S, Arvai K, Borroto C, Scuffins J, Zhang Z, Friedman B, Sroka H, Heeley  
747 J, et al. 2020. Mobile element insertion detection in 89,874 clinical exomes. *Genet Med* 1–  
748 5.
- 749 van de Lagemaat LN, Medstrand P, Mager DL. 2006. Multiple effects govern endogenous retrovirus  
750 survival patterns in human gene introns. *Genome Biol* **7**: R86.
- 751 Visscher PM, Wray NR, Zhang Q, Sklar P, McCarthy MI, Brown MA, Yang J. 2017. 10 Years of  
752 GWAS Discovery: Biology, Function, and Translation. *The American Journal of Human*  
753 *Genetics* **101**: 5–22.
- 754 Wang J, Song L, Grover D, Azrak S, Batzer MA, Liang P. 2006. dbRIP: A Highly Integrated  
755 Database of Retrotransposon Insertion Polymorphisms in Humans. *Hum Mutat* **27**: 323–  
756 329.
- 757 Wang L, Norris ET, Jordan IK. 2017. Human Retrotransposon Insertion Polymorphisms Are  
758 Associated with Health and Disease via Gene Regulatory Phenotypes. *Front Microbiol* **8**.  
759 <https://www.frontiersin.org/articles/10.3389/fmicb.2017.01418/full> (Accessed August 20,  
760 2020).
- 761 Waterson RH, Lander ES, Wilson RK, The Chimpanzee Sequencing and Analysis Consortium. 2005.  
762 Initial sequence of the chimpanzee genome and comparison with the human genome.  
763 *Nature* **437**: 69–87.
- 764 Watterson GA. 1975. On the number of segregating sites in genetical models without recombination.  
765 *Theoretical Population Biology* **7**: 256–276.
- 766 Werling DM, Brand H, An J-Y, Stone MR, Zhu L, Glessner JT, Collins RL, Dong S, Layer RM,  
767 Markenscoff-Papadimitriou E, et al. 2018. An analytical framework for whole-genome  
768 sequence association studies and its implications for autism spectrum disorder. *Nat Genet*  
769 **50**: 727–736.
- 770 Wu D, Dou J, Chai X, Bellis C, Wilm A, Shih CC, Soon WWJ, Bertin N, Lin CB, Khor CC, et al.

- 771           2019. Large-Scale Whole-Genome Sequencing of Three Diverse Asian Populations in  
772           Singapore. *Cell* **179**: 736-749.e15.
- 773   Zahn J, Kaplan MH, Fischer S, Dai M, Meng F, Saha AK, Cervantes P, Chan SM, Dube D, Omenn  
774           GS, et al. 2015. Expansion of a novel endogenous retrovirus throughout the  
775           pericentromeres of modern humans. *Genome Biology* **16**: 74.
- 776   Zerbino DR, Achuthan P, Akanni W, Amode MR, Barrell D, Bhai J, Billis K, Cummins C, Gall A,  
777           Girón CG, et al. 2018. Ensembl 2018. *Nucleic Acids Res* **46**: D754–D761.
- 778   Zhang P, Luo H, Li Y, Wang Y, Wang J, Zheng Y, Niu Y, Shi Y, Zhou H, Song T, et al. 2020. NyuWa  
779           Genome Resource: Deep Whole Genome Sequencing Based Chinese Population Variation  
780           Profile and Reference Panel. *bioRxiv* 2020.11.10.376574.
- 781   Zhang Y, Romanish MT, Mager DL. 2011. Distributions of Transposable Elements Reveal  
782           Hazardous Zones in Mammalian Introns. *PLOS Computational Biology* **7**: e1002046.
- 783   Zhou W, Emery SB, Flasch DA, Wang Y, Kwan KY, Kidd JM, Moran JV, Mills RE. 2020.  
784           Identification and characterization of occult human-specific LINE-1 insertions using long-  
785           read sequencing technology. *Nucleic Acids Res* **48**: 1146–1163.
- 786   2019. The GenomeAsia 100K Project enables genetic discoveries across Asia. *Nature* **576**: 106–111.
- 787
- 788
- 789
